# Supplementary material for: A Novel CDC42 Variant with Impaired Thymopoiesis, IL-7R Signaling, PAK1 Binding, and TCR Repertoire Diversity
Source: PubMed Central journal article supplement (PMC10661826; doi:10.1007/s10875-023-01561-0), 2023-08-15
Supplement: 10875_2023_1561_MOESM1_ESM.pdf [file 10875_2023_1561_MOESM1_ESM.pdf]

**Supplementary figures**

**A**

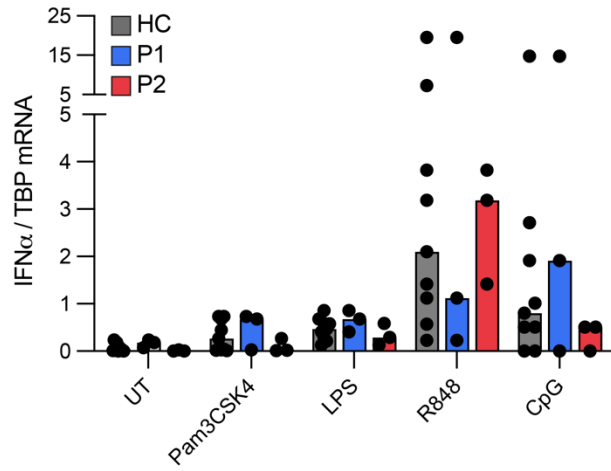

**B**

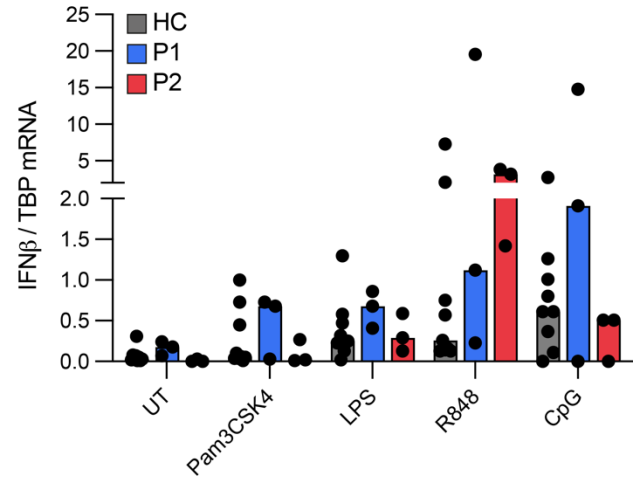

**C**

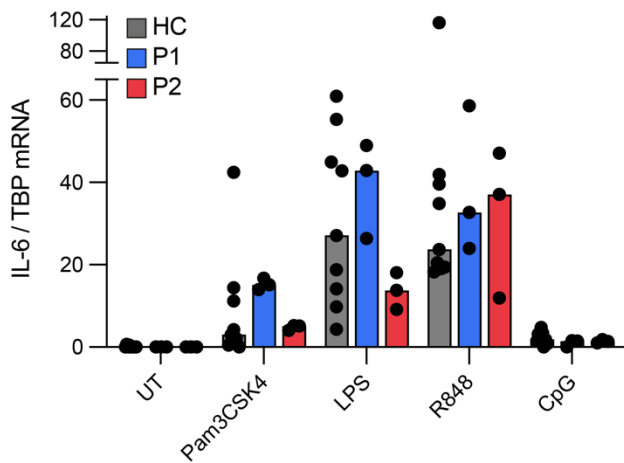

**D**

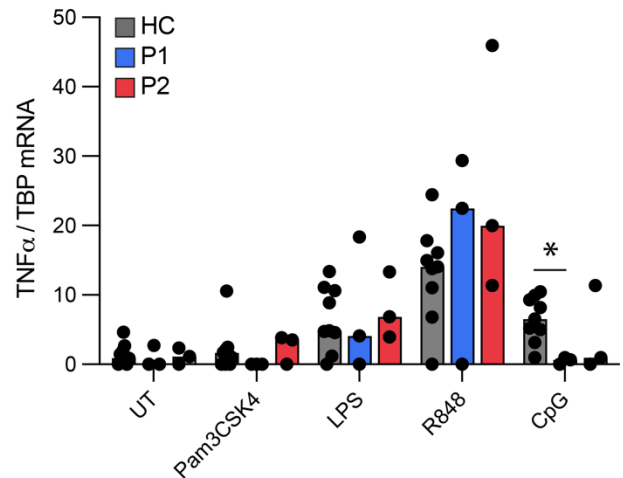

**Supplementary Figure S1:** PBMCs from patients (P) and healthy controls (HC) were stimulated with Pam3Csk4 (200 ng/mL), LPS (10 ng/ml), R848 (1  $\mu$ g/mL), and CpG ODN 2006 (10  $\mu$ g/mL) for 6 h, after which total RNA was harvested and induction of IFN $\alpha$ , IFN $\beta$ , IL-6 and TNF $\alpha$  mRNA levels were measured by RT-qPCR using TBP as reference. All stimulations were done in triplicate for each donor, HC, n=3, bars

indicate median. Statistical comparison: Kruskal-Wallis test. Only significant differences are indicated. \*

$p < 0.05$ .

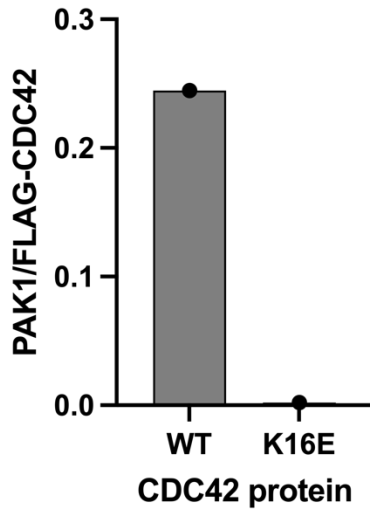

**Supplementary Figure S2:** Quantification of PAK1 co-IP western blot by densitometry using ImageLab software. Bands for pulled down PAK1 was normalized to bands for pulled down FLAG-CDC42 WT and FLAG-CDC42 K16E respectively.
